# Supplementary material
Source: publisher figshare collection journal article supplement (https://karger.figshare.com/ndownloader/files/22162800)

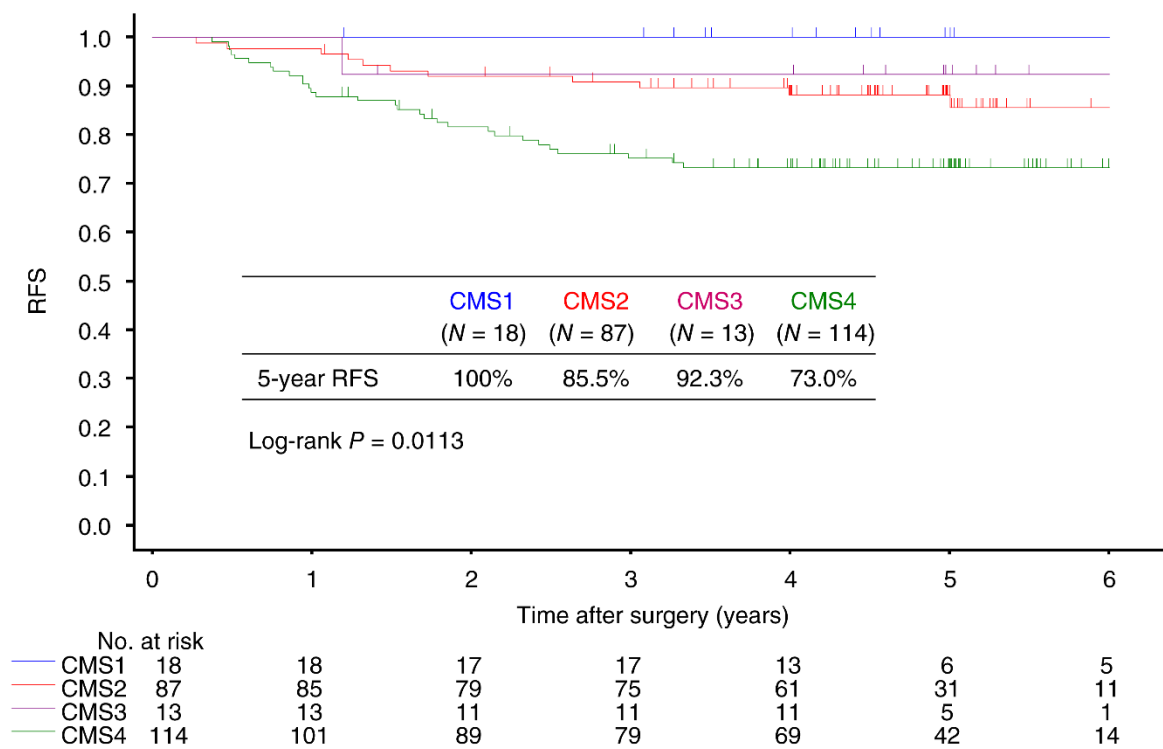

**Supplementary Figure S2.** Kaplan-Meier estimates of RFS by CMS.

Supplement: Supplementary file 1 [file 22162800]
